# Supplementary material for: Insights into chemical components, health-promoting effects, and processing impact of golden chanterelle mushroom Cantharellus cibarius
Source: Royal Society of Chemistry journal article supplement (doi:10.1039/d4fo00891j), 2024-01-01
Supplement: d4fo00891j1.pdf [file d4fo00891j1.pdf]

## Supplemental Tables

**Supplemental Table 1.** Proximate compositions of CC in different regions.

| No. | Region   | Moisture                  | Fat                      | Proteins                  | Carbohydrates             | Ash                       | Energy                     | References |
|-----|----------|---------------------------|--------------------------|---------------------------|---------------------------|---------------------------|----------------------------|------------|
| 1   | Bulgaria | 89.59 ± 0.06 <sup>a</sup> | 3.48 ± 0.10 <sup>b</sup> | 22.95 ± 0.27 <sup>b</sup> | 65.73 ± 0.29 <sup>b</sup> | 7.84 ± 0.10 <sup>b</sup>  | 390.90 ± 0.67 <sup>c</sup> | 21         |
| 2   | Romania  | 2.17 ± 0.02 <sup>b</sup>  | 2.17 ± 0.04 <sup>b</sup> | 21.03 ± 0.04 <sup>b</sup> | 65.06 ± 0.11 <sup>b</sup> | 9.57 ± 0.08 <sup>b</sup>  | 363.90 ± 0.66 <sup>c</sup> | 36         |
| 3   | Croatia  | 85.76 ± 0.79 <sup>a</sup> | 1.90 ± 0.61 <sup>b</sup> | 30.91 ± 0.28 <sup>b</sup> | 52.50 ± 0.24 <sup>b</sup> | 8.80 ± 0.05 <sup>b</sup>  | 355.55 ± 0.07 <sup>c</sup> | 43         |
| 4   | /        | /                         | 4.49 ± 0.06 <sup>b</sup> | 69.14 ± 3.26 <sup>b</sup> | 14.25 ± 3.96 <sup>b</sup> | 12.12 ± 0.26 <sup>b</sup> | 375.76 ± 5.40 <sup>c</sup> | 42         |
| 5   | Portugal | 92.38 ± 0.31 <sup>a</sup> | 0.22 ± 0.04 <sup>a</sup> | 4.09 ± 0.09 <sup>a</sup>  | 2.44 ± 0.33 <sup>a</sup>  | 0.88 ± 0.05 <sup>a</sup>  | 28.18 ± 1.39 <sup>d</sup>  | 45         |
| 6   | Greece   | 82.57 ± 0.69 <sup>a</sup> | 2.88 ± 0.02 <sup>b</sup> | 21.57 ± 0.21 <sup>b</sup> | 66.07 ± 0.23 <sup>b</sup> | 9.44 ± 0.01 <sup>b</sup>  | /                          | 195        |
| 7   | Tunisia  | 88.82 ± 0.29 <sup>a</sup> | 2.82 ± 0.00 <sup>b</sup> | 12.37 ± 0.01 <sup>b</sup> | 72.24 ± 0.03 <sup>b</sup> | 12.57 ± 0.02 <sup>b</sup> | 368.55 ± 0.07 <sup>c</sup> | 39         |
| 8   | China    | /                         | 5.41 ± 0.01 <sup>b</sup> | 23.24 ± 0.17 <sup>b</sup> | 52.61 ± 0.27 <sup>b</sup> | 12.71 ± 0.01 <sup>b</sup> | 376.21 ± 0.21 <sup>c</sup> | 23         |
| 9   | China    | 90.36 ± 0.82 <sup>a</sup> | 2.12 ± 0.14 <sup>b</sup> | 21.82 ± 0.21 <sup>b</sup> | 37.72 ± 0.28 <sup>b</sup> | 3.54 ± 0.34 <sup>b</sup>  | /                          | 41         |

<sup>a</sup>g/100 g fw; <sup>b</sup>g/100 g dw; <sup>c</sup>kcal/100 g dw; <sup>d</sup>kcal/100 g fw.

"/": Data are absent from the literature.

**Supplemental Table 2.** Amino acids content of CC in different regions.

| No. | Region    | Asp <sup>a,c</sup> | Ser <sup>a,e</sup> | Glu <sup>a,c</sup> | Gly <sup>a,c</sup> | Ala <sup>a,c</sup> | Tyr <sup>a,d</sup> | His <sup>a,d</sup> | Arg <sup>a,d</sup> | Pro <sup>a,f</sup> | Asn <sup>a,f</sup> | Gln <sup>a,f</sup> | Cys <sup>a,f</sup> |
|-----|-----------|--------------------|--------------------|--------------------|--------------------|--------------------|--------------------|--------------------|--------------------|--------------------|--------------------|--------------------|--------------------|
| 1   | China     | 1.09               | 0.65               | 1.65               | 0.53               | 0.68               | 0.33               | 0.62               | 1.01               | 0.52               | /                  | /                  | 0.14               |
| 2   | Croatia   | 0.06 ± 0.17        | 0.18 ± 0.08        | 29.99 ± 0.13       | 0.13 ± 0.07        | 4.98 ± 0.25        | n.d.               | 3.15 ± 0.19        | 0.44 ± 0.14        | /                  | /                  | /                  | 1.99 ± 0.16        |
| 3   | China     | 17.59              | 9.42               | 29.46              | 7.34               | 8.49               | 5.00               | 6.14               | 10.01              | 16.54              | /                  | /                  | 1.92               |
| 4   | Tunisia   | 2.30 ± 0.31        | 2.78 ± 0.12        | 2.00 ± 0.11        | /                  | 1.81 ± 0.45        | 0.78 ± 0.19        | /                  | /                  | /                  | /                  | /                  | 1.39 ± 0.26        |
| 5   | Tanzanian | n.d.               | n.d.               | 26.80              | 1.16               | 33.20              | n.d.               | /                  | n.d.               | /                  | n.d.               | n.d.               | /                  |
| 6   | Portugal  | n.d.               | 253.80 ± 1.00      | 888.20 ± 4.50      | 404.30 ± 1.50      | 1356.00 ± 8.70     | 301.30             | 341.00 ± 0.20      | 95.20              | 253.80 ± 0.10      | 222.00 ± 0.20      | 1863.60 ± 21.30    | 190.30 ± 1.20      |
| 7   | Finland   | 1.29 ± 0.08        | 0.53 ± 0.03        | 3.78 ± 0.24        | 0.21 ± 0.02        | 0.65 ± 0.02        | 0.43 ± 0.03        | 1.13 ± 0.08        | 4.47 ± 0.46        | n.d.               | 0.29 ± 0.02        | 4.74 ± 0.39        | n.d.               |
| 8   | Finland   | 9.70 ± 0.50        | 4.30 ± 0.30        | 31.00 ± 3.10       | 1.50 ± 0.10        | 11.30 ± 0.90       | 4.80 ± 0.10        | 9.60 ± 0.30        | 40.00 ± 5.30       | n.d.               | 1.70 ± 0.40        | 26.20 ± 1.70       | n.d.               |

  

| Met <sup>b,d</sup> | Thr <sup>b,e</sup> | Ile <sup>b,d</sup> | Leu <sup>b,d</sup> | Phe <sup>b,d</sup> | Lys <sup>b,f</sup> | Val <sup>b,d</sup> | Trp <sup>b,d</sup> | Total AA     | units         | References |
|--------------------|--------------------|--------------------|--------------------|--------------------|--------------------|--------------------|--------------------|--------------|---------------|------------|
| 0.11               | 0.62               | 0.55               | 0.89               | 0.50               | 0.70               | 0.59               | n.d.               | 11.19        | (mg/g dw)     | 41         |
| 0.41 ± 0.03        | 8.98 ± 0.16        | n.d.               | 0.21 ± 0.04        | 0.06 ± 0.08        | 5.74 ± 0.27        | 1.34 ± 0.36        | 0.02 ± 0.19        | 57.68 ± 0.11 | (mg/g dw)     | 43         |
| 4.04               | 9.36               | 6.79               | 12.91              | 10.30              | 9.51               | 8.86               | 1.60               | 175.28       | (mg/g dw)     | 23         |
| 1.00 ± 0.19        | 1.08 ± 0.29        | 0.96 ± 0.11        | 3.02 ± 0.15        | 2.98 ± 0.45        | 1.93 ± 0.17        | n.d.               | /                  | 22.03 ± 0.40 | (mg/g dw)     | 39         |
| 9.19               | 7.99               | /                  | n.d.               | n.d.               | n.d.               | 6.11               | 10.50              | /            | (% dw)        | 196        |
| /                  | 182.40 ± 0.50      | 95.20              | 142.70 ± 0.10      | 95.20 ± 0.40       | 364.80 ± 0.30      | n.d.               | 150.70 ± 0.10      | /            | (mg/kg dw)    | 197        |
| 0.14 ± 0.00        | 0.47 ± 0.02        | 0.23 ± 0.01        | 0.46 ± 0.02        | 0.25 ± 0.01        | 1.00 ± 0.10        | 0.31 ± 0.02        | 0.32 ± 0.04        | /            | (mg/g dw)     | 95         |
| n.d.               | 3.20 ± 0.10        | 1.40 ± 0.10        | 5.90 ± 0.30        | 2.40 ± 0.20        | 7.40 ± 0.90        | 13.70 ± 0.50       | n.d.               | 174.00       | (mg/100 g fw) | 94         |

<sup>a</sup>Non-essential amino acids; <sup>b</sup>Essential amino acids; <sup>c</sup>MSG-like amino acids; <sup>d</sup>Bitter amino acids; <sup>e</sup>Sweet amino acids; <sup>f</sup>Tasteless or no reported taste property amino acids.

“n.d.”: Not detected. “/”: Data are absent from the literature.

**Supplemental Table 3.** Free sugar content of CC in different regions (g/100 g dw).

| No. | Region   | D-Galacturonic acid <sup>a</sup> | Fucose <sup>a</sup> | Arabinos <sup>a</sup> | Glucose <sup>a</sup> | Mannitol <sup>a</sup> | Mannose <sup>a</sup> | Xylose <sup>a</sup> | Fructose <sup>a</sup> | Maltose <sup>b</sup> | Trehalose <sup>b</sup> | Total          | Units        | References |
|-----|----------|----------------------------------|---------------------|-----------------------|----------------------|-----------------------|----------------------|---------------------|-----------------------|----------------------|------------------------|----------------|--------------|------------|
| 1   | Tunisia  | /                                | /                   | /                     | 0.770 ± 0.009        | 2.570 ± 0.001         | /                    | /                   | /                     | /                    | 12.010 ± 0.091         | 15.350 ± 0.073 | (g/100 g dw) | 39         |
| 2   | Croatia  | /                                | /                   | /                     | 7.980 ± 0.130        | 8.560 ± 0.020         | 28.560 ± 0.020       | /                   | /                     | /                    | 6.680 ± 0.090          | 48.780 ± 0.120 | (g/100 g dw) | 43         |
| 3   | /        | /                                | /                   | /                     | /                    | 8.330 ± 0.090         | /                    | /                   | /                     | n.d.                 | 6.120 ± 0.100          | 14.450 ± 0.190 | (g/100 g dw) | 42         |
| 4   | China    | 0.003                            | 0.010               | 0.001                 | 0.222                | n.d.                  | 0.040                | 0.004               | 0.00                  | 0.003                | 0.043                  | /              | (g/100 g dw) | 23         |
| 5   | Portugal | /                                | /                   | /                     | /                    | 1.060 ± 0.020         | /                    | /                   | /                     | n.d.                 | 0.850 ± 0.010          | 1.910 ± 0.030  | (g/100 g fw) | 45         |

<sup>a</sup>Monosaccharide; <sup>b</sup>Disaccharide.

“n.d.”: Not detected.

“/”: Data are absent from the literature.

**Supplemental Table 4. Fatty acids content of CC in different regions.**

| N o. | Region   | C4:0 | C6:0        | C8:0        | C10:0       | C11:0       | C12:0         | C13:0       | C14:0         | C15:0         | C16:0            | C17:0         | C18:0          | C20:0        | C21:0       | C22:0         | C23:0         | C24:0         | C14:1       | C15:1 | C16:1         | C17:1       | C18:1            | C18:1n9      |
|------|----------|------|-------------|-------------|-------------|-------------|---------------|-------------|---------------|---------------|------------------|---------------|----------------|--------------|-------------|---------------|---------------|---------------|-------------|-------|---------------|-------------|------------------|--------------|
| 1    | China    | /    | /           | n.d.        | /           | /           | 0.11          | /           | 1.21          | 2.64          | 2.90             | 0.31          | 6.56           | 1.70         | 0.30        | 1.85          | 0.93          | 2.52          | /           | /     | 1.71          | /           | 9.61             | /            |
| 2    | India    | 6.60 | /           | /           | /           | /           | /             | /           | 8.00          | 0.10          | 18.30            | n.d.          | 6.00           | n.d.         | /           | n.d.          | /             | n.d.          | 8.30        | /     | n.d.          | /           | n.d.             | 35.40        |
| 3    | /        | /    | 0.67 ± 0.05 | 0.04 ± 0.00 | 0.01 ± 0.00 | /           | 0.03 ± 0.00   | /           | 0.13 ± 0.00   | 0.31 ± 0.02   | 13.08 ± 0.14     | 0.19 ± 0.01   | 6.49 ± 0.11    | 0.31 ± 0.02  | 0.23 ± 0.02 | 0.38 ± 0.03   | 0.11 ± 0.01   | 0.88 ± 0.06   | /           | /     | 0.49 ± 0.03   | /           | /                | 10.78 ± 0.34 |
| 4    | Bulgaria | /    | /           | /           | n.d.        | /           | 0.10 ± 0.02   | 0.10 ± 0.02 | n.d.          | 0.50 ± 0.10   | 27.30 ± 0.30     | n.d.          | 0.40 ± 0.10    | 0.40 ± 0.10  | /           | 0.20 ± 0.05   | /             | /             | /           | /     | 1.20 ± 0.20   | n.d.        | 31.70 ± 0.60     | /            |
| 5    | Portugal | /    | 0.06 ± 0.01 | 0.10 ± 0.00 | 0.05 ± 0.00 | /           | 0.02 ± 0.00   | /           | 0.09 ± 0.00   | 0.14 ± 0.00   | 7.19 ± 0.14      | 0.09 ± 0.00   | 3.34 ± 0.00    | 0.18 ± 0.00  | 0.12 ± 0.01 | 0.23 ± 0.00   | 0.06 ± 0.00   | 0.51 ± 0.02   | /           | /     | 0.20 ± 0.00   | /           | /                | 8.13 ± 0.01  |
| 6    | Turkey   | /    | /           | /           | /           | /           | /             | /           | 0.67          | 1.74          | 14.86            | n.d.          | 11.86          | /            | /           | n.d.          | /             | n.d.          | /           | /     | 2.54          | /           | 28.62            | /            |
| 7    | Portugal | /    | n.d.        | n.d.        | n.d.        | n.d.        | 0.055 ± 0.002 | n.d.        | 2.315 ± 0.247 | 0.523 ± 0.048 | 15.660 ± 0.119   | 0.504 ± 0.000 | 7.017 ± 0.126  | n.d.         | n.d.        | 0.320 ± 0.020 | 0.061 ± 0.001 | 0.498 ± 0.002 | n.d.        | /     | 0.324 ± 0.023 | n.d.        | 148.168 ± 2.320  | /            |
| 8    | Turkey   | 0.20 | 0.06        | 0.15        | 0.49        | 0.04        | 0.09          | 0.03        | 0.46          | 0.41          | 17.05            | 0.15          | 5.56           | 0.29         | 0.03        | 0.25          | n.d.          | 0.81          | 0.03        | 0.38  | 0.57          | 0.08        | 21.12            | /            |
| 9    | China    | /    | 0.39 ± 0.10 | 1.03 ± 0.12 | 0.15 ± 0.05 | 2.11 ± 0.13 | 1.19 ± 0.16   | 0.52 ± 0.27 | 9.23 ± 2.11   | 17.47 ± 2.36  | 1,445.90 ± 82.38 | 23.24 ± 3.25  | 661.19 ± 53.12 | 34.06 ± 2.88 | 2.35 ± 0.07 | 26.78 ± 1.86  | 4.34 ± 0.51   | 76.71 ± 7.42  | 0.23 ± 0.05 | /     | 37.27 ± 6.13  | 6.99 ± 0.66 | 2,432.80 ± 46.44 | /            |
| 10   | Poland   | /    | /           | /           | /           | /           | 0.12 ± 0.08   | /           | 0.16 ± 0.03   | 0.17 ± 0.03   | 12.49 ± 1.53     | 0.12 ± 0.02   | 3.56 ± 0.19    | 0.70 ± 0.27  | /           | 0.42 ± 0.46   | /             | /             | /           | /     | 0.39 ± 0.06   | n.d.        | /                | 6.76 ± 0.60  |

| C18:1n1      | C18:2             | C18:2n6      | C18:3        | C18:3n3     | C18:3n6 | C20:1        | C20:2         | C20:3n3     | C20:3n6       | C20:4         | C20:4n6       | C20:5       | C20:5n3     | C22:1       | C22:2       | C22:6       | C24:1        | Total              | SFA               | MUFA              | PUFA             | Units    | References |
|--------------|-------------------|--------------|--------------|-------------|---------|--------------|---------------|-------------|---------------|---------------|---------------|-------------|-------------|-------------|-------------|-------------|--------------|--------------------|-------------------|-------------------|------------------|----------|------------|
| /            | 5.75              | /            | /            | 5.73        | 1.24    | /            | 2.46          | /           | /             | /             | /             | /           | /           | /           | /           | /           | /            | 47.52              | 21.02             | 11.32             | 15.18            | mg/g dw  | 23         |
| /            | 17.30             | /            | n.d.         | /           | /       | /            | /             | /           | /             | /             | /             | /           | /           | /           | /           | /           | n.d.         | /                  | 39.00             | 43.70             | 17.30            | %        | 198        |
| /            | /                 | 53.59 ± 0.12 | /            | 0.08 ± 0.01 | /       | 11.48 ± 0.02 | 0.17 ± 0.00   | /           | /             | /             | /             | /           | /           | /           | /           | /           | 0.55 ± 0.04  | /                  | 22.63 ± 0.24      | 23.29 ± 0.25      | 54.08 ± 0.01     | %        | 42         |
| /            | 25.20 ± 0.20      | /            | 0.60 ± 0.10  | /           | /       | /            | 0.20 ± 0.05   | /           | /             | 1.60 ± 0.20   | /             | /           | /           | /           | /           | /           | /            | /                  | /                 | /                 | /                | %        | 21         |
| /            | /                 | 50.01 ± 0.09 | /            | 0.10 ± 0.00 | /       | 27.98 ± 0.20 | 0.13 ± 0.01   | /           | n.d.          | /             | /             | /           | 0.09 ± 0.00 | /           | /           | /           | 1.23 ± 0.04  | /                  | 12.04 ± 0.52      | 37.54 ± 0.14      | 50.42 ± 0.65     | %        | 45         |
| /            | 38.64             | /            | /            | /           | /       | 1.17         | /             | /           | /             | /             | /             | /           | /           | /           | n.d.        | /           | n.d.         | /                  | 29.13             | 32.33             | 38.54            | %        | 49         |
| /            | 654.706 ± 3.471   | /            | /            | n.d.        | n.d.    | n.d.         | 0.088 ± 0.001 | /           | 0.088 ± 0.000 | /             | 0.085 ± 0.006 | /           | n.d.        | /           | /           | /           | n.d.         | 830.621 ± 43.528   | 26.953 ± 10.464   | 148.493 ± 10.294  | 655.176 ± 34.929 | mg/kg dw | 47         |
| /            | 49.62             | /            | 0.02         | /           | /       | 0.22         | 0.14          | n.d.        | 0.03          | 0.07          | /             | 0.26        | /           | 0.37        | 0.25        | 0.45        | n.d.         | /                  | 26.03             | 22.85             | 51.22            | %        | 48         |
| /            | 5,279.02 ± 160.31 | /            | 25.05 ± 3.31 | /           | /       | 50.27 ± 6.38 | 36.05 ± 4.36  | 7.75 ± 0.27 | 1.10 ± 0.18   | 14.45 ± 10.12 | /             | 4.10 ± 0.87 | /           | 7.20 ± 0.71 | 6.58 ± 1.31 | 5.69 ± 0.19 | 16.60 ± 1.36 | 10,237.81 ± 403.48 | 2,306.65 ± 151.30 | 5,379.80 ± 183.28 | 2,551.36 ± 47.98 | mg/kg dw | 199        |
| 20.57 ± 1.69 | 53.94 ± 2.30      | /            | 0.11 ± 0.03  | /           | /       | 0.06 ± 0.03  | 0.40 ± 0.12   | /           | /             | /             | /             | /           | /           | /           | /           | /           | /            | /                  | 17.75 ± 2.11      | 27.79 ± 1.91      | 54.46 ± 2.28     | %        | 165        |

“n.d.”: Not detected.

“/” : Data are absent from the literature.

**Supplemental Table 5.** Mineral content of CC in different regions (mg/kg dw).

| No. | Regions                | Ca <sup>a</sup>  | K <sup>a</sup>      | Na <sup>a</sup> | P <sup>a</sup>   | Mg <sup>a</sup>  |
|-----|------------------------|------------------|---------------------|-----------------|------------------|------------------|
| 1   | Poland                 | 211.00 ± 73.20   | 46,024.00 ± 4492.00 | 142.00 ± 19.20  | /                | 84200 ± 54.20    |
| 2   | China                  | 2068.31 ± 311.04 | 25861.50 ± 1571.90  | 288.79 ± 37.32  | /                | 1243.80 ± 233.56 |
| 3   | Bulgaria               | 459.59 ± 17.35   | 31308.13 ± 1185.24  | 139.43 ± 5.02   | 2713.62 ± 168.84 | 626.06 ± 65.29   |
| 4   | Greece                 | /                | /                   | /               | /                | 866.3 ± 11.90    |
| 5   | Bosnia and Herzegovina | 266.30 ± 0.05    | 28375.40 ± 4.35     | 53.10 ± 0.01    | 3794.00 ± 0.05   | 586.60 ± 0.20    |
| 6   | Poland                 | 747.00 ± 251.00  | 42000.00 ± 8000.00  | 158.00 ± 78.00  | /                | 950.00 ± 130.00  |
| 7   | Romania                | 1100.00 ± 3.00   | /                   | /               | /                | 710.00 ± 4.00    |
| 8   | Bulgaria               | 459.59 ± 17.35   | 31308.13 ± 1185.24  | 139.43 ± 5.02   | 2713.62 ± 168.84 | 626.06 ± 65.29   |

  

| Cu <sup>b</sup> | Fe <sup>b</sup> | Mn <sup>b</sup> | Zn <sup>b</sup> | Ni <sup>b</sup> | Co <sup>b</sup> | Se <sup>b</sup> | Cr <sup>b</sup> | References |
|-----------------|-----------------|-----------------|-----------------|-----------------|-----------------|-----------------|-----------------|------------|
| 48.40 ± 4.20    | 58.90 ± 5.28    | 23.70 ± 3.25    | 113.00 ± 9.50   | /               | /               | /               | /               | 56         |
| 51.66 ± 0.08    | 351.15 ± 0.64   | 25.29 ± 0.93    | 81.95 ± 13.43   | /               | /               | /               | /               | 23         |
| 27.57 ± 4.96    | 82.29 ± 6.75    | 18.32 ± 4.24    | 78.83 ± 3.86    | 0.33 ± 0.16     | 1.48 ± 0.14     | /               | /               | 21         |
| 32.49 ± 0.30    | 118.20 ± 2.24   | 22.09 ± 0.54    | 54.29 ± 1.23    | 1.07 ± 0.03     | 0.05 ± 0.01     | /               | 1.57 ± 0.04     | 183        |
| 26.74 ± 0.01    | 138.99 ± 0.02   | 11.79 ± 0.01    | 57.02 ± 0.01    | 0.92 ± 0.01     | 0.30 ± 0.01     | 0.45 ± 0.01     | 0.45 ± 0.01     | 119        |
| 49.10 ± 10.00   | 218.00 ± 112.00 | 35.30 ± 14.30   | 100.00 ± 17.00  | 1.01 ± 1.51     | /               | /               | /               | 55         |
| 64.10 ± 0.70    | 178.00 ± 0.00   | 26.80 ± 0.40    | 188.00 ± 1.00   | 3.48 ± 0.13     | 0.192 ± 0.01    | 0.165 ± 0.01    | /               | 57         |
| /               | /               | /               | /               | /               | /               | /               | /               | 200        |

<sup>a</sup>Macrominerals; <sup>b</sup>Trace Minerals.

“n.d.”: Not detected.

“/”: Data are absent from the literature.

**Supplemental Table 6.** Vitamin content of CC in different regions.

|                                         | Dry Weight              |             | References | Fresh Weight |             | References |
|-----------------------------------------|-------------------------|-------------|------------|--------------|-------------|------------|
| Vitamin B <sub>9</sub> (Folate)         | /                       | /           | /          | 1.98-2.46    | ug/100 g fw | 64         |
| Vitamin B <sub>12</sub> (Cobalamin)     | 1.09 ± 0.27-1.82 ± 0.57 | mg/100 g dw | 65         | /            | /           | /          |
| Vitamin C ( <i>L</i> -Ascorbic Acid)    | 0.86 ± 0.01             | mg/g dw     | 42         | 0.40 ± 0.02  | mg/g fw     | 45         |
| Vitamin D <sub>2</sub> (Ergocalciferol) | 0.12-6.30               | ug/g dw     | 61         | 10.70        | ug/100 g fw | 62         |
| α-tocopherol                            | 0.12 ± 0.00             | ug/g dw     | 42         | 13.40 ± 0.76 | ng/g fw     | 45         |
| Vitamin E    β-tocopherol               | 0.03 ± 0.01             | ug/g dw     | 42         | 2.87 ± 0.06  | ng/g fw     | 45         |
| γ-tocopherol                            | 0.03 ± 0.01             | ug/g dw     | 42         | n.d.         | ng/g fw     | 45         |

“n.d.”: Not detected.

“/” : Data are absent from the literature.

**Supplemental Table 7.** Flavor 5'-nucleotides content of CC in different regions.

| No. | Regions | 5'-GMP      | 5'-IMP      | 5'-XMP      | Total flavor 5'-nucleotides | Units       | References |
|-----|---------|-------------|-------------|-------------|-----------------------------|-------------|------------|
| 1   | Croatia | 0.21 ± 0.07 | 0.03 ± 0.12 | 0.14 ± 0.07 | 0.38                        | mg/g dw     | 43         |
| 2   | Finland | 0.19 ± 0.03 | 0.22 ± 0.01 | /           | 0.41                        | mg/g dw     | 95         |
| 3   | China   | 0.29        | 0.19        | 0.96        | 1.44                        | mg/g dw     | 23         |
| 4   | Finland | 2.50 ± 0.60 | n.d.        | /           | 2.50                        | mg/100 g fw | 94         |
| 5   | China   | 0.60 ± 0.07 | 0.88 ± 0.05 | /           | 1.48                        | mg/g dw     | 97         |

"/": Data are absent from the literature.

5'-GMP: 5'-Guanosine monophosphate; 5'-IMP: 5'-Inosine monophosphate; 5'-XMP: 5'-Xanthosine monophosphate.
